# Supplementary material for: An In Silico Molecular Modelling-Based Prediction of Potential Keap1 Inhibitors from Hemidesmus indicus (L.) R.Br. against Oxidative-Stress-Induced Diseases
Source: MDPI journal article supplement (doi:10.3390/molecules28114541), 2023-06-03

Supplementary Table S1. List of bonding interactions between selected three bioactive compounds and standard drug CPUY192018 with Keap1 protein.

| Compound (CID)           | Residues | Amino acid | Distance (Å) | Bond category |
|--------------------------|----------|------------|--------------|---------------|
| Hemidescine<br>101664025 | 366X     | ALA        | 3.77         | Hydrophobic   |
|                          | 514X     | VAL        | 3.85         | Hydrophobic   |
|                          | 561X     | VAL        | 3.80         | Hydrophobic   |
|                          | 367X     | GLY        | 2.89         | Hydrogen      |
|                          | 415X     | ARG        | 2.67         | Hydrogen      |
|                          | 416X     | ILE        | 2.32         | Hydrogen      |
|                          | 418X     | VAL        | 2.76         | Hydrogen      |
|                          | 561X     | VAL        | 3.26         | Hydrogen      |
|                          | 561X     | VAL        | 2.68         | Hydrogen      |
|                          | 563X     | GLN        | 3.33         | Hydrogen      |
|                          | 326X     | ARG        | 4.85         | Salt bridge   |
| Beta-Amyrin<br>73145     | 366X     | ALA        | 3.90         | Hydrophobic   |
|                          | 418X     | VAL        | 3.44         | Hydrophobic   |
|                          | 514X     | VAL        | 3.51         | Hydrophobic   |
|                          | 561X     | VAL        | 3.93         | Hydrophobic   |
| Quercetin<br>5280343     | 366X     | ALA        | 3.93         | Hydrophobic   |
|                          | 367X     | GLY        | 2.14         | Hydrogen      |
|                          | 415X     | ARG        | 1.89         | Hydrogen      |
|                          | 415X     | ARG        | 2.30         | Hydrogen      |
|                          | 465X     | VAL        | 2.31         | Hydrogen      |
|                          | 465X     | VAL        | 2.44         | Hydrogen      |
|                          | 510X     | ALA        | 2.08         | Hydrogen      |
|                          | 512X     | VAL        | 2.72         | Hydrogen      |
| CPUY192018<br>73330369   | 606X     | VAL        | 2.39         | Hydrogen      |
|                          | 514X     | VAL        | 3.66         | Hydrophobic   |
|                          | 367X     | GLY        | 2.46         | Hydrogen      |
|                          | 418X     | VAL        | 1.55         | Hydrogen      |
|                          | 465X     | VAL        | 1.97         | Hydrogen      |
|                          | 561X     | VAL        | 2.09         | Hydrogen      |
|                          | 608X     | VAL        | 3.26         | Hydrogen      |

Supplementary Figure S1: Keap1 protein grid box

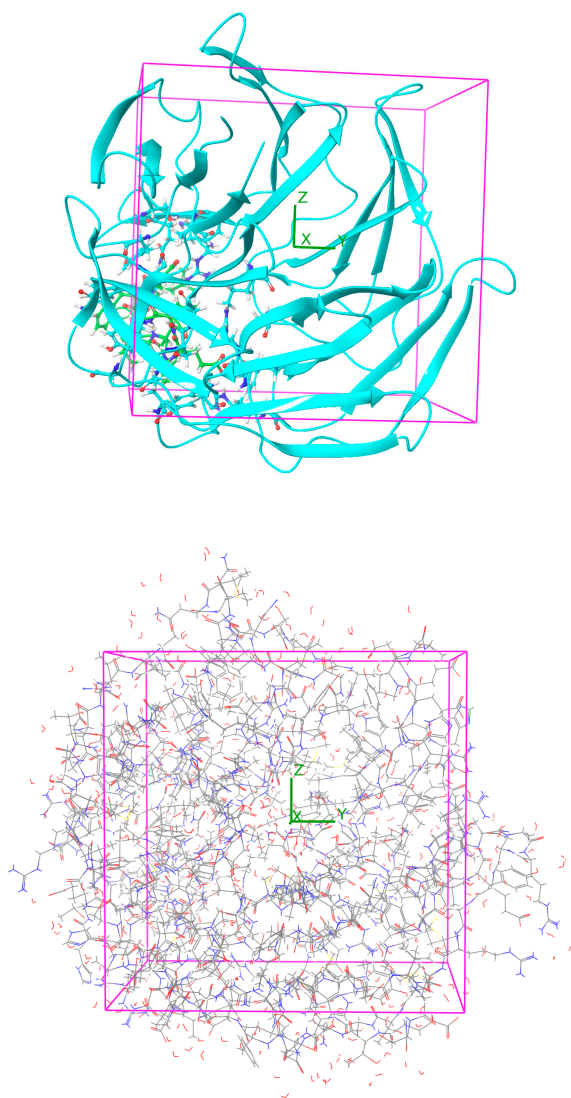

Supplement: s1 [file s1]
